# Supplementary material for: Computer-Assisted System with Multiple Feature Fused Support Vector Machine for Sperm Morphology Diagnosis
Source: Biomed Res Int. 2013 Sep 26;2013:687607. doi: 10.1155/2013/687607 (PMC3803132; doi:10.1155/2013/687607)
Supplement: Supplementary file 1 — We provide all the code and images necessary for accomplishment of our experiment, the code is produced with Matlab 2008a and the guidance of using the code to produce the results listed in the issue is also included [file 687607.f1.zip › Supplementary Material/code and image/code/calculate_divline.m]

clear all;
close all;

count1 = 0;
count2 = 0;
percentage1 = 0;
percentage2 = 0;

load normal_ARD_GLV.mat;%ARD and gray_level_value are obtained from getCoordinate_RP_GrayLevelValue.m
nARD = ARD;
nGLV = gray_level_value;
load abnormal_ARD_GLV.mat;
abnARD = ARD;
abnGLV = gray_level_value;
ncombination = zeros(81,1);
abncombination = zeros(81,1);

for k = 1:9
    a = 0.1*k;
    combination1 = a*nGLV+(1-a)*nARD;
    ncombination(1:80,1) = combination1;
    combination2 = a*abnGLV+(1-a)*abnARD;
    abncombination(1:80,1) = combination2;
    combination = zeros(160,1);
    combination(1:80,1) = ncombination(1:80,1);
    combination(81:160,1) = abncombination(1:80,1);
    percentage1(k) = 0;
    for i = 1:160            
        divline = combination(i,1);
        count1 = 0;
        count2 = 0;        
        for j = 1:80
            if divline > ncombination(j);
                count1 = count1+1;
            end
            if divline < abncombination(j);
                count1 = count1+1;
            end
            if divline > abncombination(j);
                count2 = count2+1;
            end
            if divline < ncombination(j);
                count2 = count2+1;
            end
        end
        if percentage1(k) < count1/160
            percentage1(k) = count1/160;
            divline1{k} = divline;
            num = i;
        end

    end
end

x = 1:160;
for i = 1:9
    a = 0.1*i;
    ncombination = zeros(81,1);
    abncombination = zeros(81,1);
    combination1 = a*nGLV+(1-a)*nARD;
    ncombination(1:80,1) = combination1;
    combination2 = a*abnGLV+(1-a)*abnARD;
    abncombination(1:80,1) = combination2;
    combination = zeros(160,1);
    full_combination(1:80,i) = ncombination(1:80,1);
    full_combination(81:160,i) = abncombination(1:80,1);
    str{i} = ['�� = ',num2str(a)];
    figure,h = plot(x,full_combination(:,i));    
    hold on;
    line([1,160],[divline1{i},divline1{i}]);
    hold off;
    legend(h,str{i});
end
hold off;
