# Supplementary material for: Computer-Assisted System with Multiple Feature Fused Support Vector Machine for Sperm Morphology Diagnosis
Source: Biomed Res Int. 2013 Sep 26;2013:687607. doi: 10.1155/2013/687607 (PMC3803132; doi:10.1155/2013/687607)
Supplement: Supplementary file 1 — We provide all the code and images necessary for accomplishment of our experiment, the code is produced with Matlab 2008a and the guidance of using the code to produce the results listed in the issue is also included [file 687607.f1.zip › Supplementary Material/code and image/code/DirectMinus.m]

clear all;
close all;
%KNN


normalcell{1} = imread('3-10.jpg');
normalcell{2} = imread('5-02.jpg');
normalcell{3} = imread('7-07.jpg');
normalcell{4} = imread('11-05.jpg');
normalcell{5} = imread('12_15.jpg');
normalcell{6} = imread('13_05.jpg');
normalcell{7} = imread('13_09.jpg');
normalcell{8} = imread('20_11.jpg');
normalcell{9} = imread('25_06.jpg');
normalcell{10} = imread('33_07.jpg');
normalcell{11} = imread('31_06.jpg');
normalcell{12} = imread('33_11.jpg');
normalcell{13} = imread('36_01.jpg');
normalcell{14} = imread('38_10.jpg');
normalcell{15} = imread('5_07.jpg');
normalcell{16} = imread('38_11.jpg');
normalcell{17} = imread('42_06.jpg');
normalcell{18} = imread('43_05.jpg');
normalcell{19} = imread('47_02.jpg');
normalcell{20} = imread('48_01.jpg');
normalcell{21} = imread('48_02.jpg');
normalcell{22} = imread('50_02.jpg');
normalcell{23} = imread('50_09.jpg');
normalcell{24} = imread('52_07.jpg');
normalcell{25} = imread('54_01.jpg');
normalcell{26} = imread('56_07.jpg');
normalcell{27} = imread('58_04.jpg');
normalcell{28} = imread('59_06.jpg');
normalcell{29} = imread('59_08.jpg');
normalcell{30} = imread('60_06.jpg');
normalcell{31} = imread('60_12.jpg');
normalcell{32} = imread('61_02.jpg');
normalcell{33} = imread('61_03.jpg');
normalcell{34} = imread('63_08.jpg');
normalcell{35} = imread('64_05.jpg');
normalcell{36} = imread('64_07.jpg');
normalcell{37} = imread('64_10.jpg');
normalcell{38} = imread('65_11.jpg');
normalcell{39} = imread('66_01.jpg');
normalcell{40} = imread('66_04.jpg');
normalcell{41} = imread('68_07.jpg');
normalcell{42} = imread('70_03.jpg');
normalcell{43} = imread('72_06.jpg');
normalcell{44} = imread('73_01.jpg');
normalcell{45} = imread('73_08.jpg');
normalcell{46} = imread('76_06.jpg');
normalcell{47} = imread('76_13.jpg');
normalcell{48} = imread('76_14.jpg');
normalcell{49} = imread('80_06.jpg');
normalcell{50} = imread('81_06.jpg');
normalcell{51} = imread('84_12.jpg');
normalcell{52} = imread('85_05.jpg');
normalcell{53} = imread('88_15.jpg');
normalcell{54} = imread('92_10.jpg');
normalcell{55} = imread('93_04.jpg');
normalcell{56} = imread('96_02.jpg');
normalcell{57} = imread('96_07.jpg');
normalcell{58} = imread('96_18.jpg');
normalcell{59} = imread('97_03.jpg');
normalcell{60} = imread('97_09.jpg');
normalcell{61} = imread('98_09.jpg');
normalcell{62} = imread('98_10.jpg');
normalcell{63} = imread('99.jpg');
normalcell{64} = imread('99_01.jpg');
normalcell{65} = imread('99_02.jpg');
normalcell{66} = imread('99_09.jpg');
normalcell{67} = imread('99_12.jpg');
normalcell{68} = imread('100_08.jpg');
normalcell{69} = imread('101_01.jpg');
normalcell{70} = imread('101_09.jpg');
normalcell{71} = imread('102_01.jpg');
normalcell{72} = imread('106_03.jpg');
normalcell{73} = imread('106_05.jpg');
normalcell{74} = imread('107_02.jpg');
normalcell{75} = imread('107_06.jpg');
normalcell{76} = imread('109_01.jpg');
normalcell{77} = imread('112_02.jpg');
normalcell{78} = imread('112_04.jpg');
normalcell{79} = imread('113_06.jpg');
normalcell{80} = imread('114_04.jpg');

abnormalcell{1} = imread('1-02.jpg');
abnormalcell{2} = imread('1-04.jpg');
abnormalcell{3} = imread('100-09.jpg');
abnormalcell{4} = imread('100-12.jpg');
abnormalcell{5} = imread('101-11.jpg');
abnormalcell{6} = imread('103-02.jpg');
abnormalcell{7} = imread('104-01.jpg');
abnormalcell{8} = imread('108-02.jpg');
abnormalcell{9} = imread('113-05.jpg');
abnormalcell{10} = imread('117-02.jpg');
abnormalcell{11} = imread('10-02.jpg');
abnormalcell{12} = imread('11-01.jpg');
abnormalcell{13} = imread('11-02.jpg');
abnormalcell{14} = imread('11-03.jpg');
abnormalcell{15} = imread('11-04.jpg');
abnormalcell{16} = imread('11-07.jpg');
abnormalcell{17} = imread('11-09.jpg');
abnormalcell{18} = imread('12-02.jpg');
abnormalcell{19} = imread('12-14.jpg');
abnormalcell{20} = imread('12-16.jpg');
abnormalcell{21} = imread('12-20.jpg');
abnormalcell{22} = imread('13-06.jpg');
abnormalcell{23} = imread('13-07.jpg');
abnormalcell{24} = imread('1-06.jpg');
abnormalcell{25} = imread('13-08.jpg');
abnormalcell{26} = imread('13-10.jpg');
abnormalcell{27} = imread('14-04.jpg');
abnormalcell{28} = imread('14-05.jpg');
abnormalcell{29} = imread('14-11.jpg');
abnormalcell{30} = imread('14-14.jpg');
abnormalcell{31} = imread('14-16.jpg');
abnormalcell{32} = imread('100-04.jpg');
abnormalcell{33} = imread('100-05.jpg');
abnormalcell{34} = imread('100-06.jpg');
abnormalcell{35} = imread('101-03.jpg');
abnormalcell{36} = imread('101-04.jpg');
abnormalcell{37} = imread('101-06.jpg');
abnormalcell{38} = imread('101-07.jpg');
abnormalcell{39} = imread('102-03.jpg');
abnormalcell{40} = imread('104-03.jpg');
abnormalcell{41} = imread('106-02.jpg');
abnormalcell{42} = imread('106-04.jpg');
abnormalcell{43} = imread('106-06.jpg');
abnormalcell{44} = imread('107-01.jpg');
abnormalcell{45} = imread('107-03.jpg');
abnormalcell{46} = imread('107-09.jpg');
abnormalcell{47} = imread('108-01.jpg');
abnormalcell{48} = imread('108-04.jpg');
abnormalcell{49} = imread('108-05.jpg');
abnormalcell{50} = imread('108-09.jpg');
abnormalcell{51} = imread('109-03.jpg');
abnormalcell{52} = imread('109-05.jpg');
abnormalcell{53} = imread('109-06.jpg');
abnormalcell{54} = imread('110-02.jpg');
abnormalcell{55} = imread('110-03.jpg');
abnormalcell{56} = imread('110-04.jpg');
abnormalcell{57} = imread('110-05.jpg');
abnormalcell{58} = imread('110-06.jpg');
abnormalcell{59} = imread('110-07.jpg');
abnormalcell{60} = imread('110-09.jpg');
abnormalcell{61} = imread('110-10.jpg');
abnormalcell{62} = imread('110-11.jpg');
abnormalcell{63} = imread('111-01.jpg');
abnormalcell{64} = imread('111-05.jpg');
abnormalcell{65} = imread('111-06.jpg');
abnormalcell{66} = imread('112-05.jpg');
abnormalcell{67} = imread('113-02.jpg');
abnormalcell{68} = imread('113-04.jpg');
abnormalcell{69} = imread('113-07.jpg');
abnormalcell{70} = imread('114-02.jpg');
abnormalcell{71} = imread('114-05.jpg');
abnormalcell{72} = imread('114-06.jpg');
abnormalcell{73} = imread('114-10.jpg');
abnormalcell{74} = imread('114-12.jpg');
abnormalcell{75} = imread('115-06.jpg');
abnormalcell{76} = imread('116-01.jpg');
abnormalcell{77} = imread('116-02.jpg');
abnormalcell{78} = imread('116-04.jpg');
abnormalcell{79} = imread('116-09.jpg');
abnormalcell{80} = imread('116-10.jpg');

cellNum = 80;
answer = zeros(cellNum,1);
for i = 1:cellNum
    normalcell{i} = rgb2gray(normalcell{i});
	abnormalcell{i} = rgb2gray(abnormalcell{i});
end

for k = 1:cellNum
    I = abnormalcell{k};
    for i = 1:cellNum
    	result(2*i-1) = sum(sum(abs(I-normalcell{i})));
        result(2*i) = sum(sum(abs(I-abnormalcell{i})));
    end
    sortResult(k,1:2*cellNum) = sort(result);
    for i = 1:cellNum
        for j = 1:2*cellNum
            if sortResult(k,i) == result(j)
                sortResult(k,i) = rem(j,2);%take the value 1 if normal
            end
        end
    end
%    answer(k,1) = sum(sortResult(1:10));
    sortResult(k,11) = sum(sortResult(k,1:10));%take the value of the top ten ones as criteria     
end
x = 1:80;
y = 81:160;
L =  sortResult(:,11);  
b = unique(L);
count = hist(L,b)';
figure,plot(x,L);
hold on;
plot([0,80],[3.5,3.5]);
hold off;
