# Supplementary material for: Computer-Assisted System with Multiple Feature Fused Support Vector Machine for Sperm Morphology Diagnosis
Source: Biomed Res Int. 2013 Sep 26;2013:687607. doi: 10.1155/2013/687607 (PMC3803132; doi:10.1155/2013/687607)
Supplement: Supplementary file 1 — We provide all the code and images necessary for accomplishment of our experiment, the code is produced with Matlab 2008a and the guidance of using the code to produce the results listed in the issue is also included [file 687607.f1.zip › Supplementary Material/code and image/code/EllipseforSperm.m]

clear all;
close all;

percentage1 = 0;
percentage2 = 0;

normalcell{1} = imread('3-10.jpg');
normalcell{2} = imread('5-02.jpg');
normalcell{3} = imread('7-07.jpg');
normalcell{4} = imread('11-05.jpg');
normalcell{5} = imread('12_15.jpg');
normalcell{6} = imread('13_05.jpg');
normalcell{7} = imread('13_09.jpg');
normalcell{8} = imread('20_11.jpg');
normalcell{9} = imread('25_06.jpg');
normalcell{10} = imread('33_07.jpg');
normalcell{11} = imread('31_06.jpg');
normalcell{12} = imread('33_11.jpg');
normalcell{13} = imread('36_01.jpg');
normalcell{14} = imread('38_10.jpg');
normalcell{15} = imread('5_07.jpg');
normalcell{16} = imread('38_11.jpg');
normalcell{17} = imread('42_06.jpg');
normalcell{18} = imread('43_05.jpg');
normalcell{19} = imread('47_02.jpg');
normalcell{20} = imread('48_01.jpg');
normalcell{21} = imread('48_02.jpg');
normalcell{22} = imread('50_02.jpg');
normalcell{23} = imread('50_09.jpg');
normalcell{24} = imread('52_07.jpg');
normalcell{25} = imread('54_01.jpg');
normalcell{26} = imread('56_07.jpg');
normalcell{27} = imread('58_04.jpg');
normalcell{28} = imread('59_06.jpg');
normalcell{29} = imread('59_08.jpg');
normalcell{30} = imread('60_06.jpg');
normalcell{31} = imread('60_12.jpg');
normalcell{32} = imread('61_02.jpg');
normalcell{33} = imread('61_03.jpg');
normalcell{34} = imread('63_08.jpg');
normalcell{35} = imread('64_05.jpg');
normalcell{36} = imread('64_07.jpg');
normalcell{37} = imread('64_10.jpg');
normalcell{38} = imread('65_11.jpg');
normalcell{39} = imread('66_01.jpg');
normalcell{40} = imread('66_04.jpg');
normalcell{41} = imread('68_07.jpg');
normalcell{42} = imread('70_03.jpg');
normalcell{43} = imread('72_06.jpg');
normalcell{44} = imread('73_01.jpg');
normalcell{45} = imread('73_08.jpg');
normalcell{46} = imread('76_06.jpg');
normalcell{47} = imread('76_13.jpg');
normalcell{48} = imread('76_14.jpg');
normalcell{49} = imread('80_06.jpg');
normalcell{50} = imread('81_06.jpg');
normalcell{51} = imread('84_12.jpg');
normalcell{52} = imread('85_05.jpg');
normalcell{53} = imread('88_15.jpg');
normalcell{54} = imread('92_10.jpg');
normalcell{55} = imread('93_04.jpg');
normalcell{56} = imread('96_02.jpg');
normalcell{57} = imread('96_07.jpg');
normalcell{58} = imread('96_18.jpg');
normalcell{59} = imread('97_03.jpg');
normalcell{60} = imread('97_09.jpg');
normalcell{61} = imread('98_09.jpg');
normalcell{62} = imread('98_10.jpg');
normalcell{63} = imread('99.jpg');
normalcell{64} = imread('99_01.jpg');
normalcell{65} = imread('99_02.jpg');
normalcell{66} = imread('99_09.jpg');
normalcell{67} = imread('99_12.jpg');
normalcell{68} = imread('100_08.jpg');
normalcell{69} = imread('101_01.jpg');
normalcell{70} = imread('101_09.jpg');
normalcell{71} = imread('102_01.jpg');
normalcell{72} = imread('106_03.jpg');
normalcell{73} = imread('106_05.jpg');
normalcell{74} = imread('107_02.jpg');
normalcell{75} = imread('107_06.jpg');
normalcell{76} = imread('109_01.jpg');
normalcell{77} = imread('112_02.jpg');
normalcell{78} = imread('112_04.jpg');
normalcell{79} = imread('113_06.jpg');
normalcell{80} = imread('114_04.jpg');

abnormalcell{1} = imread('1-02.jpg');
abnormalcell{2} = imread('1-04.jpg');
abnormalcell{3} = imread('100-09.jpg');
abnormalcell{4} = imread('100-12.jpg');
abnormalcell{5} = imread('101-11.jpg');
abnormalcell{6} = imread('103-02.jpg');
abnormalcell{7} = imread('104-01.jpg');
abnormalcell{8} = imread('108-02.jpg');
abnormalcell{9} = imread('113-05.jpg');
abnormalcell{10} = imread('117-02.jpg');
abnormalcell{11} = imread('10-02.jpg');
abnormalcell{12} = imread('11-01.jpg');
abnormalcell{13} = imread('11-02.jpg');
abnormalcell{14} = imread('11-03.jpg');
abnormalcell{15} = imread('11-04.jpg');
abnormalcell{16} = imread('11-07.jpg');
abnormalcell{17} = imread('11-09.jpg');
abnormalcell{18} = imread('12-02.jpg');
abnormalcell{19} = imread('12-14.jpg');
abnormalcell{20} = imread('12-16.jpg');
abnormalcell{21} = imread('12-20.jpg');
abnormalcell{22} = imread('13-06.jpg');
abnormalcell{23} = imread('13-07.jpg');
abnormalcell{24} = imread('1-06.jpg');
abnormalcell{25} = imread('13-08.jpg');
abnormalcell{26} = imread('13-10.jpg');
abnormalcell{27} = imread('14-04.jpg');
abnormalcell{28} = imread('14-05.jpg');
abnormalcell{29} = imread('14-11.jpg');
abnormalcell{30} = imread('14-14.jpg');
abnormalcell{31} = imread('14-16.jpg');
abnormalcell{32} = imread('100-04.jpg');
abnormalcell{33} = imread('100-05.jpg');
abnormalcell{34} = imread('100-06.jpg');
abnormalcell{35} = imread('101-03.jpg');
abnormalcell{36} = imread('101-04.jpg');
abnormalcell{37} = imread('101-06.jpg');
abnormalcell{38} = imread('101-07.jpg');
abnormalcell{39} = imread('102-03.jpg');
abnormalcell{40} = imread('104-03.jpg');
abnormalcell{41} = imread('106-02.jpg');
abnormalcell{42} = imread('106-04.jpg');
abnormalcell{43} = imread('106-06.jpg');
abnormalcell{44} = imread('107-01.jpg');
abnormalcell{45} = imread('107-03.jpg');
abnormalcell{46} = imread('107-09.jpg');
abnormalcell{47} = imread('108-01.jpg');
abnormalcell{48} = imread('108-04.jpg');
abnormalcell{49} = imread('108-05.jpg');
abnormalcell{50} = imread('108-09.jpg');
abnormalcell{51} = imread('109-03.jpg');
abnormalcell{52} = imread('109-05.jpg');
abnormalcell{53} = imread('109-06.jpg');
abnormalcell{54} = imread('110-02.jpg');
abnormalcell{55} = imread('110-03.jpg');
abnormalcell{56} = imread('110-04.jpg');
abnormalcell{57} = imread('110-05.jpg');
abnormalcell{58} = imread('110-06.jpg');
abnormalcell{59} = imread('110-07.jpg');
abnormalcell{60} = imread('110-09.jpg');
abnormalcell{61} = imread('110-10.jpg');
abnormalcell{62} = imread('110-11.jpg');
abnormalcell{63} = imread('111-01.jpg');
abnormalcell{64} = imread('111-05.jpg');
abnormalcell{65} = imread('111-06.jpg');
abnormalcell{66} = imread('112-05.jpg');
abnormalcell{67} = imread('113-02.jpg');
abnormalcell{68} = imread('113-04.jpg');
abnormalcell{69} = imread('113-07.jpg');
abnormalcell{70} = imread('114-02.jpg');
abnormalcell{71} = imread('114-05.jpg');
abnormalcell{72} = imread('114-06.jpg');
abnormalcell{73} = imread('114-10.jpg');
abnormalcell{74} = imread('114-12.jpg');
abnormalcell{75} = imread('115-06.jpg');
abnormalcell{76} = imread('116-01.jpg');
abnormalcell{77} = imread('116-02.jpg');
abnormalcell{78} = imread('116-04.jpg');
abnormalcell{79} = imread('116-09.jpg');
abnormalcell{80} = imread('116-10.jpg');

cellNum = 80;

for i = 1:cellNum
    normalcell{i} = rgb2gray(normalcell{i});
	abnormalcell{i} = rgb2gray(abnormalcell{i});
    normalcell{i} = 255-normalcell{i};
    abnormalcell{i} = 255-abnormalcell{i};
    normalcell{i} = imadjust(normalcell{i});
    abnormalcell{i} = imadjust(abnormalcell{i});
end

%First of all, we rotate the sperm

 for i = 1:cellNum
    I = normalcell{i};
    level = graythresh(I);
    bw = im2bw(I,level);
    [B,L] = bwboundaries(bw);
    objectnum = numel(B); 
    coordinate = B{1,1};
    edgeLength = length(coordinate);
    leastArea = 20000;
    for j = 1:90
        C = pi*j/180;
        mostLeft = 200;
        mostUp = 100;
        mostRight = 0;
        mostDown = 0;
        for k = 1:edgeLength
            newCoordinate(k,1) = coordinate(k,1)/cos(C)+(coordinate(k,2)-coordinate(k,1)*tan(C))*sin(C);
            newCoordinate(k,2) = (coordinate(k,2)-coordinate(k,1)*tan(C))*cos(C);
            if newCoordinate(k,1)< mostLeft
                mostLeft = newCoordinate(k,1);
            end
            if newCoordinate(k,1)> mostRight
                mostRight = newCoordinate(k,1);
            end
            if newCoordinate(k,2)< mostUp
                mostUp = newCoordinate(k,2);
            end
            if newCoordinate(k,2)> mostDown
                mostDown = newCoordinate(k,2);
            end
        end
        area = (mostRight-mostLeft)*(mostDown-mostUp);
        if area < leastArea
            leastArea = area;
            correctC = C;
            if (mostRight-mostLeft)>(mostDown-mostUp)
                alongAXE(i) = mostRight-mostLeft;
                ashortAXE(i) = mostDown-mostUp;
            else
                alongAXE(i) = mostDown-mostUp;
                ashortAXE(i) = mostRight-mostLeft;
            end
        end
    end
    %After rotation,we start to guess the ellipse that fits the sperm best

    ellipseArea = sum(sum(bw)');
    centerX = sum(coordinate(:,1))/edgeLength;
    centerY = sum(coordinate(:,2))/edgeLength;
    count = 0;
    areadif(i) = 20000;
        for k = 1:500
            %r1 = j/10;
            r2 = k/10;
            r1 = ellipseArea/(pi*r2);
            for test1 = 1:100
                for test2 = 200
                    if (bw(test1,test2)>0)&&(((test1*cos(correctC) - test2*sin(correctC) + centerX)^2)/r1^2 + ((test1*sin(correctC) + test2*cos(correctC) + centerY)^2)/r2^2) >1
                        count = count+1;
                    end
                    if (bw(test1,test2) == 0)&&(((test1*cos(correctC) - test2*sin(correctC) + centerX)^2)/r1^2 + ((test1*sin(correctC) + test2*cos(correctC) + centerY)^2)/r2^2) <=1
                        count = count+1;
                    end
                end  
            end
            if count < areadif
                areadif(i) = count;                
                if r1>=r2
                    ratio(i,1) = r1/r2;
                    difr(i,1) = r1;
                    difr(i,2) = r2;
                end
                if r1<r2
                    ratio(i,1) = r2/r1;
                    difr(i,1) = r2;
                    difr(i,2) = r1;
                end
            end
        end   
 end
 
 for i = 1:cellNum
    I = abnormalcell{i};
    level = graythresh(I);
    bw = im2bw(I,level);
    [B,L] = bwboundaries(bw);
    objectnum = numel(B); 
    coordinate = B{1,1};
    edgeLength = length(coordinate);
    leastArea = 20000;
    for j = 1:90
        C = pi*j/180;
        mostLeft = 200;
        mostUp = 100;
        mostRight = 0;
        mostDown = 0;
        for k = 1:edgeLength
            newCoordinate(k,1) = coordinate(k,1)/cos(C)+(coordinate(k,2)-coordinate(k,1)*tan(C))*sin(C);
            newCoordinate(k,2) = (coordinate(k,2)-coordinate(k,1)*tan(C))*cos(C);
            if newCoordinate(k,1)< mostLeft
                mostLeft = newCoordinate(k,1);
            end
            if newCoordinate(k,1)> mostRight
                mostRight = newCoordinate(k,1);
            end
            if newCoordinate(k,2)< mostUp
                mostUp = newCoordinate(k,2);
            end
            if newCoordinate(k,2)> mostDown
                mostDown = newCoordinate(k,2);
            end
        end
        area = (mostRight-mostLeft)*(mostDown-mostUp);
        if area < leastArea
            leastArea = area;
            if (mostRight-mostLeft)>(mostDown-mostUp)
                ablongAXE(i) = mostRight-mostLeft;
                abshortAXE(i) = mostDown-mostUp;
            else
                ablongAXE(i) = mostDown-mostUp;
                abshortAXE(i) = mostRight-mostLeft;
            end
        end
    end
 end
 for i = 1:80
     ratio(i,1) = alongAXE(i)/ashortAXE(i);
     ratio(i,2) = ablongAXE(i)/abshortAXE(i);
     ratio(i,1) = round(ratio(i,1)*10000)/10000;
     ratio(i,2) = round(ratio(i,2)*10000)/10000;
 
 end

 density1 = 0;
 density2 = 0;
 n1 = 0;
 n2 = 0;
 abn1 = 0;
 abn2 = 0;
 ratio(:,1) = sort(ratio(:,1));
 ratio(:,2) = sort(ratio(:,2));
 for i = 1:80
     for j = i:80
         if (density1<((j-i+1)/(ratio(j,1)-ratio(i,1))))&&(ratio(i,1)~=ratio(j,1))             
             density1 = (j-i+1)/(ratio(j,1)-ratio(i,1));
             n1 = i;
             n2 = j;
         end
         if (density2<((j-i+1)/(ratio(j,2)-ratio(i,2))))&&(ratio(i,2)~=ratio(j,2))
             density2 = (j-i+1)/(ratio(j,2)-ratio(i,2));
             abn1 = i;
             abn2 = j;
         end

     end
 end
 
 a = sum(ratio(1:80,1))/80;
 b = sum(ratio(1:80,2))/80;
    
