# Supplementary material for: Computer-Assisted System with Multiple Feature Fused Support Vector Machine for Sperm Morphology Diagnosis
Source: Biomed Res Int. 2013 Sep 26;2013:687607. doi: 10.1155/2013/687607 (PMC3803132; doi:10.1155/2013/687607)
Supplement: Supplementary file 1 — We provide all the code and images necessary for accomplishment of our experiment, the code is produced with Matlab 2008a and the guidance of using the code to produce the results listed in the issue is also included [file 687607.f1.zip › Supplementary Material/code and image/code/extract_sperm_head.m]

clear all;
close all;
clc;

mydirN = 'E:/normalSperm/';
mydirABN = 'E:/abnormalSperm/';

PICS=dir([mydirABN,'*.jpg']);
n=size(PICS);
n=n(1);
imageNum = n;
cntpic=1;

normal_location3 = strcat(mydirABN,'extracted');%new address for sperm heads

mkdir(normal_location3);

for i=1:n
    if ~PICS(i).isdir
        original_sperm_image = imread(strcat(mydirABN,PICS(i).name));
    end
    I = rgb2gray(original_sperm_image);
    level = graythresh(I);
    bw = im2bw(I,level);
    [B,L] = bwboundaries(bw,4);
    [Ilength Iwidth] = size(I);
    new_image = zeros(60,60);
    new_image(:,:) = 255;
    new_image = uint8(new_image);
    new_image = original_sperm_image;
    for j = 1:Ilength
        for k = 1:Iwidth
            if L(j,k) == 1;
                new_image(j,k,:) = 255;
            end
        end
    end    
    imwrite(new_image,strcat(strcat(normal_location3,'/'),PICS(i).name));
end
