# Supplementary material for: Computer-Assisted System with Multiple Feature Fused Support Vector Machine for Sperm Morphology Diagnosis
Source: Biomed Res Int. 2013 Sep 26;2013:687607. doi: 10.1155/2013/687607 (PMC3803132; doi:10.1155/2013/687607)
Supplement: Supplementary file 1 — We provide all the code and images necessary for accomplishment of our experiment, the code is produced with Matlab 2008a and the guidance of using the code to produce the results listed in the issue is also included [file 687607.f1.zip › Supplementary Material/code and image/code/getCoordinate_RP_GrayLevelValue.m]

clear all;
close all;

M = 5; % M-bits-word
rankLen = 2^M; % 1 ~ 2^M
a = 0.5;

load RP0.mat
load RP1.mat
load RP2.mat
load RP3.mat
load RP4.mat
load RP5.mat
load RP6.mat
load RP7.mat
load RP8.mat
load RP9.mat

normalcell{1} = imread('3-10.jpg');
normalcell{2} = imread('5-02.jpg');
normalcell{3} = imread('7-07.jpg');
normalcell{4} = imread('11-05.jpg');
normalcell{5} = imread('12_15.jpg');
normalcell{6} = imread('13_05.jpg');
normalcell{7} = imread('13_09.jpg');
normalcell{8} = imread('20_11.jpg');
normalcell{9} = imread('25_06.jpg');
normalcell{10} = imread('33_07.jpg');
normalcell{11} = imread('31_06.jpg');
normalcell{12} = imread('33_11.jpg');
normalcell{13} = imread('36_01.jpg');
normalcell{14} = imread('38_10.jpg');
normalcell{15} = imread('5_07.jpg');
normalcell{16} = imread('38_11.jpg');
normalcell{17} = imread('42_06.jpg');
normalcell{18} = imread('43_05.jpg');
normalcell{19} = imread('47_02.jpg');
normalcell{20} = imread('48_01.jpg');
normalcell{21} = imread('48_02.jpg');
normalcell{22} = imread('50_02.jpg');
normalcell{23} = imread('50_09.jpg');
normalcell{24} = imread('52_07.jpg');
normalcell{25} = imread('54_01.jpg');
normalcell{26} = imread('56_07.jpg');
normalcell{27} = imread('58_04.jpg');
normalcell{28} = imread('59_06.jpg');
normalcell{29} = imread('59_08.jpg');
normalcell{30} = imread('60_06.jpg');
normalcell{31} = imread('60_12.jpg');
normalcell{32} = imread('61_02.jpg');
normalcell{33} = imread('61_03.jpg');
normalcell{34} = imread('63_08.jpg');
normalcell{35} = imread('64_05.jpg');
normalcell{36} = imread('64_07.jpg');
normalcell{37} = imread('64_10.jpg');
normalcell{38} = imread('65_11.jpg');
normalcell{39} = imread('66_01.jpg');
normalcell{40} = imread('66_04.jpg');
normalcell{41} = imread('68_07.jpg');
normalcell{42} = imread('70_03.jpg');
normalcell{43} = imread('72_06.jpg');
normalcell{44} = imread('73_01.jpg');
normalcell{45} = imread('73_08.jpg');
normalcell{46} = imread('76_06.jpg');
normalcell{47} = imread('76_13.jpg');
normalcell{48} = imread('76_14.jpg');
normalcell{49} = imread('80_06.jpg');
normalcell{50} = imread('81_06.jpg');
normalcell{51} = imread('84_12.jpg');
normalcell{52} = imread('85_05.jpg');
normalcell{53} = imread('88_15.jpg');
normalcell{54} = imread('92_10.jpg');
normalcell{55} = imread('93_04.jpg');
normalcell{56} = imread('96_02.jpg');
normalcell{57} = imread('96_07.jpg');
normalcell{58} = imread('96_18.jpg');
normalcell{59} = imread('97_03.jpg');
normalcell{60} = imread('97_09.jpg');
normalcell{61} = imread('98_09.jpg');
normalcell{62} = imread('98_10.jpg');
normalcell{63} = imread('99.jpg');
normalcell{64} = imread('99_01.jpg');
normalcell{65} = imread('99_02.jpg');
normalcell{66} = imread('99_09.jpg');
normalcell{67} = imread('99_12.jpg');
normalcell{68} = imread('100_08.jpg');
normalcell{69} = imread('101_01.jpg');
normalcell{70} = imread('101_09.jpg');
normalcell{71} = imread('102_01.jpg');
normalcell{72} = imread('106_03.jpg');
normalcell{73} = imread('106_05.jpg');
normalcell{74} = imread('107_02.jpg');
normalcell{75} = imread('107_06.jpg');
normalcell{76} = imread('109_01.jpg');
normalcell{77} = imread('112_02.jpg');
normalcell{78} = imread('112_04.jpg');
normalcell{79} = imread('113_06.jpg');
normalcell{80} = imread('114_04.jpg');

abnormalcell{1} = imread('1-02.jpg');
abnormalcell{2} = imread('1-04.jpg');
abnormalcell{3} = imread('100-09.jpg');
abnormalcell{4} = imread('100-12.jpg');
abnormalcell{5} = imread('101-11.jpg');
abnormalcell{6} = imread('103-02.jpg');
abnormalcell{7} = imread('104-01.jpg');
abnormalcell{8} = imread('108-02.jpg');
abnormalcell{9} = imread('113-05.jpg');
abnormalcell{10} = imread('117-02.jpg');
abnormalcell{11} = imread('10-02.jpg');
abnormalcell{12} = imread('11-01.jpg');
abnormalcell{13} = imread('11-02.jpg');
abnormalcell{14} = imread('11-03.jpg');
abnormalcell{15} = imread('11-04.jpg');
abnormalcell{16} = imread('11-07.jpg');
abnormalcell{17} = imread('11-09.jpg');
abnormalcell{18} = imread('12-02.jpg');
abnormalcell{19} = imread('12-14.jpg');
abnormalcell{20} = imread('12-16.jpg');
abnormalcell{21} = imread('12-20.jpg');
abnormalcell{22} = imread('13-06.jpg');
abnormalcell{23} = imread('13-07.jpg');
abnormalcell{24} = imread('1-06.jpg');
abnormalcell{25} = imread('13-08.jpg');
abnormalcell{26} = imread('13-10.jpg');
abnormalcell{27} = imread('14-04.jpg');
abnormalcell{28} = imread('14-05.jpg');
abnormalcell{29} = imread('14-11.jpg');
abnormalcell{30} = imread('14-14.jpg');
abnormalcell{31} = imread('14-16.jpg');
abnormalcell{32} = imread('100-04.jpg');
abnormalcell{33} = imread('100-05.jpg');
abnormalcell{34} = imread('100-06.jpg');
abnormalcell{35} = imread('101-03.jpg');
abnormalcell{36} = imread('101-04.jpg');
abnormalcell{37} = imread('101-06.jpg');
abnormalcell{38} = imread('101-07.jpg');
abnormalcell{39} = imread('102-03.jpg');
abnormalcell{40} = imread('104-03.jpg');
abnormalcell{41} = imread('106-02.jpg');
abnormalcell{42} = imread('106-04.jpg');
abnormalcell{43} = imread('106-06.jpg');
abnormalcell{44} = imread('107-01.jpg');
abnormalcell{45} = imread('107-03.jpg');
abnormalcell{46} = imread('107-09.jpg');
abnormalcell{47} = imread('108-01.jpg');
abnormalcell{48} = imread('108-04.jpg');
abnormalcell{49} = imread('108-05.jpg');
abnormalcell{50} = imread('108-09.jpg');
abnormalcell{51} = imread('109-03.jpg');
abnormalcell{52} = imread('109-05.jpg');
abnormalcell{53} = imread('109-06.jpg');
abnormalcell{54} = imread('110-02.jpg');
abnormalcell{55} = imread('110-03.jpg');
abnormalcell{56} = imread('110-04.jpg');
abnormalcell{57} = imread('110-05.jpg');
abnormalcell{58} = imread('110-06.jpg');
abnormalcell{59} = imread('110-07.jpg');
abnormalcell{60} = imread('110-09.jpg');
abnormalcell{61} = imread('110-10.jpg');
abnormalcell{62} = imread('110-11.jpg');
abnormalcell{63} = imread('111-01.jpg');
abnormalcell{64} = imread('111-05.jpg');
abnormalcell{65} = imread('111-06.jpg');
abnormalcell{66} = imread('112-05.jpg');
abnormalcell{67} = imread('113-02.jpg');
abnormalcell{68} = imread('113-04.jpg');
abnormalcell{69} = imread('113-07.jpg');
abnormalcell{70} = imread('114-02.jpg');
abnormalcell{71} = imread('114-05.jpg');
abnormalcell{72} = imread('114-06.jpg');
abnormalcell{73} = imread('114-10.jpg');
abnormalcell{74} = imread('114-12.jpg');
abnormalcell{75} = imread('115-06.jpg');
abnormalcell{76} = imread('116-01.jpg');
abnormalcell{77} = imread('116-02.jpg');
abnormalcell{78} = imread('116-04.jpg');
abnormalcell{79} = imread('116-09.jpg');
abnormalcell{80} = imread('116-10.jpg');

cellNum = 80;
for i = 1:cellNum
    normalcell{i} = rgb2gray(normalcell{i});
	abnormalcell{i} = rgb2gray(abnormalcell{i});
    normalcell{i} = 255-normalcell{i};
    abnormalcell{i} = 255-abnormalcell{i};
    normalcell{i} = imadjust(normalcell{i});
    abnormalcell{i} = imadjust(abnormalcell{i});
end
for Num = 1:cellNum
    I = normalcell{Num};
    level = graythresh(I);
    bw = im2bw(I,level);
    [B,L] = bwboundaries(bw);
    objectnum = numel(B);

    coordinate = B{1,1};

    b = unique(L);
    count = hist(L,b);
    area = sum(count,2);
    area = area(2:objectnum+1);
    empty_percentage = (sum(area) - area(1))/(sum(area));
    nonezero = find(I);
    nznum = length(nonezero);
    gray_percentage(Num,1) = 1 - (sum(sum(I)))/(255*nznum);
    gray_level_value(Num,1) = 255*gray_percentage(Num);

    %ÏÂÃæ¿ªÊ¼¼ÆËãRP
    x = coordinate(:,1);
    y = coordinate(:,2);
    xmid = round(mean(x));
    ymid = round(mean(y));
    ydist = zeros(1,size(x));
    xdist = zeros(size(x),1);
    for start = 1:200;
        if start > size(x)
            break;
        end;
        xdist(start,1) = start;

        ydist(1,start) = sqrt((x(start)-xmid)^2 + (y(start)-ymid)^2);

    end;

%---------------------------- RANK algorithm ------------------------%
% Statistic the 0/1 integers
    ydist = cycleInsert(ydist,128);%the array has to be a horizontal one not a vertical one
    rank_sta = zeros( 1, rankLen );
    mBitModel = uint8(0);
    rankNumber = 0;
    for i = 1 : length( ydist )-1
        mBitModel = bitshift( mBitModel, 1 );
    	if ydist(i+1) > ydist(i)
            mBitModel = mBitModel + 1;
        end          
       	if i >= M 
            if mBitModel == 255 
                rank_sta( 1, 256 ) = rank_sta( 1, 256 ) + 1;
            else
                if M < 8
                    mBitModel = bitset(mBitModel,M+1,0);
                end
                rank_sta( 1, mBitModel+1 ) = rank_sta( 1, mBitModel+1 ) + 1;
            end
            rankNumber = rankNumber + 1;
        end
    end

    % calculate the position for the rank_sta
    for j = 1 : length( rank_sta )
        pos = 1;
    	for k = 1 : length( rank_sta )
            if k < j
                if rank_sta(j) <= rank_sta(k)
                    pos = pos + 1;
                end
            elseif k > j
                if rank_sta(j) < rank_sta(k)
                    pos = pos + 1;
                end
            end
        end
        R(j) = pos;
    end
    P = rank_sta ./ rankNumber;
    AllcontourRank(Num,1:rankLen) = R;
    AllcontourP(Num,1:rankLen) = P;
    ARD(Num,1) = sum(abs(R-R1)+abs(R-R2)+abs(R-R3)+abs(R-R4)+abs(R-R5)+abs(R-R6)+abs(R-R7)+abs(R-R8)+abs(R-R9)+abs(R-R0))/10;
    combination = a*gray_level_value+(1-a)*ARD;
    % From above we obtain: P( probability ) and R( rank position )
end

for i = 1:cellNum
    numerator = 0;
    denominator = 0;
    R1 = AllcontourRank(i,:);
    P1 = AllcontourP(i,:);
    for k = 1:cellNum
        numerator = 0;
        denominator = 0;
        R2 = AllcontourRank(k,:);
        P2 = AllcontourP(k,:);
        for j = 1 : rankLen
            numerator = numerator + ( abs( R1(j) - R2(j) ) * P1(j)*P2(j) );
            denominator = denominator + P1(j)*P2(j);
        end
        Dm(i,k) = numerator / ( (rankLen-1) * denominator );
    end    
end
for i = 1:cellNum
    AllDm = sum(Dm);
end
[sortAD,index] = sort(AllDm);

for i = 1:10
    ModelRank(i,:) = AllcontourRank(index(1,i),:);
    ModelP(i,:) = AllcontourP(index(1,i),:);
end

x = 1:80;
y = 81:160;
figure,plot(x,ARD);
hold on;
line([1,80],[185.2,185.2]);
hold off;
figure,plot(x,gray_level_value);
hold on;
line([1,80],[68.4,68.4]);
hold off;
figure,plot(x,gray_percentage);
hold on;
line([1,80],[68.4/255,68.4/255]);
hold off;
