# Supplementary material for: Computer-Assisted System with Multiple Feature Fused Support Vector Machine for Sperm Morphology Diagnosis
Source: Biomed Res Int. 2013 Sep 26;2013:687607. doi: 10.1155/2013/687607 (PMC3803132; doi:10.1155/2013/687607)
Supplement: Supplementary file 1 — We provide all the code and images necessary for accomplishment of our experiment, the code is produced with Matlab 2008a and the guidance of using the code to produce the results listed in the issue is also included [file 687607.f1.zip › Supplementary Material/code and image/code/LineFromMid.m]

clear all;
close all;

angle = 10;
M = 8; % M-bits-word
rankLen = 2^M; % 1 ~ 2^M

normalcell{1} = imread('3-10.jpg');
normalcell{2} = imread('5-02.jpg');
normalcell{3} = imread('7-07.jpg');
normalcell{4} = imread('11-05.jpg');
normalcell{5} = imread('12_15.jpg');
normalcell{6} = imread('13_05.jpg');
normalcell{7} = imread('13_09.jpg');
normalcell{8} = imread('20_11.jpg');
normalcell{9} = imread('25_06.jpg');
normalcell{10} = imread('33_07.jpg');
normalcell{11} = imread('31_06.jpg');
normalcell{12} = imread('33_11.jpg');
normalcell{13} = imread('36_01.jpg');
normalcell{14} = imread('38_10.jpg');
normalcell{15} = imread('5_07.jpg');
normalcell{16} = imread('38_11.jpg');
normalcell{17} = imread('42_06.jpg');
normalcell{18} = imread('43_05.jpg');
normalcell{19} = imread('47_02.jpg');
normalcell{20} = imread('48_01.jpg');
normalcell{21} = imread('48_02.jpg');
normalcell{22} = imread('50_02.jpg');
normalcell{23} = imread('50_09.jpg');
normalcell{24} = imread('52_07.jpg');
normalcell{25} = imread('54_01.jpg');
normalcell{26} = imread('56_07.jpg');
normalcell{27} = imread('58_04.jpg');
normalcell{28} = imread('59_06.jpg');
normalcell{29} = imread('59_08.jpg');
normalcell{30} = imread('60_06.jpg');
normalcell{31} = imread('60_12.jpg');
normalcell{32} = imread('61_02.jpg');
normalcell{33} = imread('61_03.jpg');
normalcell{34} = imread('63_08.jpg');
normalcell{35} = imread('64_05.jpg');
normalcell{36} = imread('64_07.jpg');
normalcell{37} = imread('64_10.jpg');
normalcell{38} = imread('65_11.jpg');
normalcell{39} = imread('66_01.jpg');
normalcell{40} = imread('66_04.jpg');
normalcell{41} = imread('68_07.jpg');
normalcell{42} = imread('70_03.jpg');
normalcell{43} = imread('72_06.jpg');
normalcell{44} = imread('73_01.jpg');
normalcell{45} = imread('73_08.jpg');
normalcell{46} = imread('76_06.jpg');
normalcell{47} = imread('76_13.jpg');
normalcell{48} = imread('76_14.jpg');
normalcell{49} = imread('80_06.jpg');
normalcell{50} = imread('81_06.jpg');
normalcell{51} = imread('84_12.jpg');
normalcell{52} = imread('85_05.jpg');
normalcell{53} = imread('88_15.jpg');
normalcell{54} = imread('92_10.jpg');
normalcell{55} = imread('93_04.jpg');
normalcell{56} = imread('96_02.jpg');
normalcell{57} = imread('96_07.jpg');
normalcell{58} = imread('96_18.jpg');
normalcell{59} = imread('97_03.jpg');
normalcell{60} = imread('97_09.jpg');
normalcell{61} = imread('98_09.jpg');
normalcell{62} = imread('98_10.jpg');
normalcell{63} = imread('99.jpg');
normalcell{64} = imread('99_01.jpg');
normalcell{65} = imread('99_02.jpg');
normalcell{66} = imread('99_09.jpg');
normalcell{67} = imread('99_12.jpg');
normalcell{68} = imread('100_08.jpg');
normalcell{69} = imread('101_01.jpg');
normalcell{70} = imread('101_09.jpg');
normalcell{71} = imread('102_01.jpg');
normalcell{72} = imread('106_03.jpg');
normalcell{73} = imread('106_05.jpg');
normalcell{74} = imread('107_02.jpg');
normalcell{75} = imread('107_06.jpg');
normalcell{76} = imread('109_01.jpg');
normalcell{77} = imread('112_02.jpg');
normalcell{78} = imread('112_04.jpg');
normalcell{79} = imread('113_06.jpg');
normalcell{80} = imread('114_04.jpg');

abnormalcell{1} = imread('1-02.jpg');
abnormalcell{2} = imread('1-04.jpg');
abnormalcell{3} = imread('100-09.jpg');
abnormalcell{4} = imread('100-12.jpg');
abnormalcell{5} = imread('101-11.jpg');
abnormalcell{6} = imread('103-02.jpg');
abnormalcell{7} = imread('104-01.jpg');
abnormalcell{8} = imread('108-02.jpg');
abnormalcell{9} = imread('113-05.jpg');
abnormalcell{10} = imread('117-02.jpg');
abnormalcell{11} = imread('10-02.jpg');
abnormalcell{12} = imread('11-01.jpg');
abnormalcell{13} = imread('11-02.jpg');
abnormalcell{14} = imread('11-03.jpg');
abnormalcell{15} = imread('11-04.jpg');
abnormalcell{16} = imread('11-07.jpg');
abnormalcell{17} = imread('11-09.jpg');
abnormalcell{18} = imread('12-02.jpg');
abnormalcell{19} = imread('12-14.jpg');
abnormalcell{20} = imread('12-16.jpg');
abnormalcell{21} = imread('12-20.jpg');
abnormalcell{22} = imread('13-06.jpg');
abnormalcell{23} = imread('13-07.jpg');
abnormalcell{24} = imread('1-06.jpg');
abnormalcell{25} = imread('13-08.jpg');
abnormalcell{26} = imread('13-10.jpg');
abnormalcell{27} = imread('14-04.jpg');
abnormalcell{28} = imread('14-05.jpg');
abnormalcell{29} = imread('14-11.jpg');
abnormalcell{30} = imread('14-14.jpg');
abnormalcell{31} = imread('14-16.jpg');
abnormalcell{32} = imread('100-04.jpg');
abnormalcell{33} = imread('100-05.jpg');
abnormalcell{34} = imread('100-06.jpg');
abnormalcell{35} = imread('101-03.jpg');
abnormalcell{36} = imread('101-04.jpg');
abnormalcell{37} = imread('101-06.jpg');
abnormalcell{38} = imread('101-07.jpg');
abnormalcell{39} = imread('102-03.jpg');
abnormalcell{40} = imread('104-03.jpg');
abnormalcell{41} = imread('106-02.jpg');
abnormalcell{42} = imread('106-04.jpg');
abnormalcell{43} = imread('106-06.jpg');
abnormalcell{44} = imread('107-01.jpg');
abnormalcell{45} = imread('107-03.jpg');
abnormalcell{46} = imread('107-09.jpg');
abnormalcell{47} = imread('108-01.jpg');
abnormalcell{48} = imread('108-04.jpg');
abnormalcell{49} = imread('108-05.jpg');
abnormalcell{50} = imread('108-09.jpg');
abnormalcell{51} = imread('109-03.jpg');
abnormalcell{52} = imread('109-05.jpg');
abnormalcell{53} = imread('109-06.jpg');
abnormalcell{54} = imread('110-02.jpg');
abnormalcell{55} = imread('110-03.jpg');
abnormalcell{56} = imread('110-04.jpg');
abnormalcell{57} = imread('110-05.jpg');
abnormalcell{58} = imread('110-06.jpg');
abnormalcell{59} = imread('110-07.jpg');
abnormalcell{60} = imread('110-09.jpg');
abnormalcell{61} = imread('110-10.jpg');
abnormalcell{62} = imread('110-11.jpg');
abnormalcell{63} = imread('111-01.jpg');
abnormalcell{64} = imread('111-05.jpg');
abnormalcell{65} = imread('111-06.jpg');
abnormalcell{66} = imread('112-05.jpg');
abnormalcell{67} = imread('113-02.jpg');
abnormalcell{68} = imread('113-04.jpg');
abnormalcell{69} = imread('113-07.jpg');
abnormalcell{70} = imread('114-02.jpg');
abnormalcell{71} = imread('114-05.jpg');
abnormalcell{72} = imread('114-06.jpg');
abnormalcell{73} = imread('114-10.jpg');
abnormalcell{74} = imread('114-12.jpg');
abnormalcell{75} = imread('115-06.jpg');
abnormalcell{76} = imread('116-01.jpg');
abnormalcell{77} = imread('116-02.jpg');
abnormalcell{78} = imread('116-04.jpg');
abnormalcell{79} = imread('116-09.jpg');
abnormalcell{80} = imread('116-10.jpg');

cellNum = 80;
for i = 1:cellNum
    normalcell{i} = rgb2gray(normalcell{i});
	abnormalcell{i} = rgb2gray(abnormalcell{i});
    normalcell{i} = 255-normalcell{i};
    abnormalcell{i} = 255-abnormalcell{i};
    normalcell{i} = imadjust(normalcell{i});
    abnormalcell{i} = imadjust(abnormalcell{i});
end
radius = 0;
jump = 1;
for Num = 1:cellNum
    I = normalcell{Num};
    
    allElement = I(:);
    b = 0:255;
    [m,n] = hist(allElement,b);
    countElement(Num,1:255) =m(2:256); 
    
    level = graythresh(I);
    bw = im2bw(I,level);
    [B,L] = bwboundaries(bw);
    objectnum = numel(B);
    coordinate = B{1,1};
    
    x = coordinate(:,1);
    y = coordinate(:,2);
    xmid = round(mean(x));
    ymid = round(mean(y));
   
    for i = 1:size(x)
        dist = sqrt((x(i)-xmid)^2 + (y(i)-ymid)^2);
        if radius < dist
            radius = dist;
            distx = x(i);
            disty = y(i);
        end
    end

    points(Num,1) = I(xmid,ymid);
    x = xmid;   y = ymid;
    for i = 1:jump
        y = y+1;
        points(Num,i+1) = I(x,y);
    end
    for i = 1:jump
        x = x+1;
        points(Num,jump+i+1) = I(x,y);
    end
    leftupy = ymid - jump;    leftupx = xmid - jump;
    leftdowny = ymid - jump;    leftdownx = xmid + jump;
    rightupy = ymid + jump*2;    rightupx = xmid - jump;
    rightdowny = ymid + jump*2;   rightdownx = xmid + jump;
    currentx = xmid + jump;   currenty = ymid + jump;
    
    i = 2*jump+2;
    while 1
        %stop when touches edge
        if (currentx>100)||(currenty>200)||(currentx<1)||(currenty<1)
            break;
        end
        %the following deals with the exchange of coordinates
        if (currenty == rightdowny)&&(currentx == rightdownx)
            
            if I(currentx,currenty) ~= 0;
                points(Num,i) = I(currentx,currenty);
            end
            leftupy = leftupy - jump;    leftupx = leftupx - jump;
            leftdowny = leftdowny - jump;    leftdownx = leftdownx + jump;
            rightupy = rightupy + jump;    rightupx = rightupx - jump;
            rightdowny = rightdowny + jump;   rightdownx = rightdownx + jump;            
            for j = 1:jump
                i = i+1;
                currentx = currentx + 1;
                if (currentx>100)||(currenty>200)||(currentx<1)||(currenty<1)
                    break;
                end
                if I(currentx,currenty) ~= 0
                    points(Num,i) = I(currentx,currenty);
                else
                    i = i-1;
                end
            end
        end    
        if (currenty > leftdowny)&&(currentx == leftdownx)&&(currenty ~= rightdowny)
            currenty = currenty - 1;
            if (currentx>100)||(currenty>200)||(currentx<1)||(currenty<1)
                break;
            end
            if I(currentx,currenty) ~= 0;
                points(Num,i) = I(currentx,currenty);
            else
                i = i-1;
            end
        elseif (currenty == leftdowny)&&(currentx > leftupx)
            if (currentx>100)||(currenty>200)||(currentx<1)||(currenty<1)
                break;
            end
            if I(currentx,currenty) ~= 0;
                points(Num,i) = I(currentx,currenty);
            else
                i = i-1;
            end
            currentx = currentx - 1;
        elseif (currenty < rightupy)&&(currentx == rightupx)
            if (currentx>100)||(currenty>200)||(currentx<1)||(currenty<1)
                break;
            end
            if I(currentx,currenty) ~= 0;
                points(Num,i) = I(currentx,currenty);
            else
                i = i-1;
            end
            currenty = currenty + 1;
        elseif (currenty == rightdowny)&&(currentx < rightdownx)
            if (currentx>100)||(currenty>200)||(currentx<1)||(currenty<1)
                break;
            end
            if I(currentx,currenty) ~= 0;
                points(Num,i) = I(currentx,currenty);
            else
                i = i-1;
            end            
            currentx = currentx + 1;
        end        

        if ((currentx-xmid) > 0)&&((currenty-ymid) > 0)&&(dist == sqrt((currentx-xmid)^2 + (currenty-ymid)^2))
            break;
        end
         i = i+1;
    end

    ydist = points(Num,:);
    rank_sta = zeros( 1, rankLen );
    mBitModel = uint8(0);
    rankNumber = 0;
    for i = 1 : length( ydist )-1
        mBitModel = bitshift( mBitModel, 1 );
    	if ydist(i+1) > ydist(i)
            mBitModel = mBitModel + 1;
        end
       	if i >= M 
            if mBitModel == 255 
                rank_sta( 1, 256 ) = rank_sta( 1, 256 ) + 1;
            else
                rank_sta( 1, mBitModel+1 ) = rank_sta( 1, mBitModel+1 ) + 1;
            end
            rankNumber = rankNumber + 1;
        end
    end

    % calculate the position for the rank_sta
    for j = 1 : length( rank_sta )
        pos = 1;
    	for k = 1 : length( rank_sta )
            if k < j
                if rank_sta(j) <= rank_sta(k)
                    pos = pos + 1;
                end
            elseif k > j
                if rank_sta(j) < rank_sta(k)
                    pos = pos + 1;
                end
            end
        end
        R(j) = pos;
    end
    P = rank_sta ./ rankNumber;
    AllRank(Num,1:rankLen) = R;
    AllP(Num,1:rankLen) = P;    
end

%obtaining the R,P of GLV
for Num = 1:cellNum
    ydist = countElement(Num,:);
    rank_sta = zeros( 1, rankLen );
    mBitModel = uint8(0);
    rankNumber = 0;
    for i = 1 : length( ydist )-1
        mBitModel = bitshift( mBitModel, 1 );
        if ydist(i+1) > ydist(i)
            mBitModel = mBitModel + 1;
        end
        if i >= M
            if mBitModel == 255
                rank_sta( 1, 256 ) = rank_sta( 1, 256 ) + 1;
            else
%                 mBitModel = bitset(mBitModel,M+1,0);
                rank_sta( 1, mBitModel+1 ) = rank_sta( 1, mBitModel+1 ) + 1;
            end
            rankNumber = rankNumber + 1;
        end
    end

    % calculate the position for the rank_sta
    for j = 1 : length( rank_sta )
        pos = 1;
        for k = 1 : length( rank_sta )
            if k < j
                if rank_sta(j) <= rank_sta(k)
                    pos = pos + 1;
                end
            elseif k > j
                if rank_sta(j) < rank_sta(k)
                    pos = pos + 1;
                end
            end
        end
        R(j) = pos;
    end
    P = rank_sta ./ rankNumber;
    GLVrank(Num,1:rankLen) = R;
    GLVP(Num,1:rankLen) = P;
end

% Calculate the Dm( S1, S2 )=numerator / denominator

for i = 1:cellNum
    numerator = 0;
    denominator = 0;
    R1 = AllRank(i,:);
    P1 = AllP(i,:);
    R3 =  GLVrank(i,:);
    P3 = GLVP(i,:);
    for k = 1:cellNum
        numerator = 0;
        denominator = 0;
        GLVnumerator = 0;
        GLVdenominator = 0;
        R2 = AllRank(k,:);
        P2 = AllP(k,:);
        R4 =  GLVrank(k,:);
        P4 = GLVP(k,:);
        for j = 1 : rankLen
            numerator = numerator + ( abs( R1(j) - R2(j) ) * P1(j)*P2(j) );
            denominator = denominator + P1(j)*P2(j);
            GLVnumerator = GLVnumerator + ( abs( R3(j) - R4(j) ) * P3(j)*P4(j) );
            GLVdenominator = GLVdenominator + P3(j)*P4(j);
        end
        Dm(i,k) = numerator / ( (rankLen-1) * denominator );
        GLVDm(i,k) = GLVnumerator / ( (rankLen-1) * GLVdenominator );
    end
end
for i = 1:cellNum
    AllDm = sum(Dm);
    AllGLVDm = sum(GLVDm);
end
[sortAD,index] = sort(AllDm);
[sortGLVAD,GLVindex] = sort(AllGLVDm);
