# Supplementary material for: Computer-Assisted System with Multiple Feature Fused Support Vector Machine for Sperm Morphology Diagnosis
Source: Biomed Res Int. 2013 Sep 26;2013:687607. doi: 10.1155/2013/687607 (PMC3803132; doi:10.1155/2013/687607)
Supplement: Supplementary file 1 — We provide all the code and images necessary for accomplishment of our experiment, the code is produced with Matlab 2008a and the guidance of using the code to produce the results listed in the issue is also included [file 687607.f1.zip › Supplementary Material/code and image/code/SIFTforSperm.m]

clear all;
close all;
run('D:/matlab/VLFEATROOT/toolbox/vl_setup');

percentage1 = 0;
percentage2 = 0;

normalcell{1} = imread('3-10.jpg');
normalcell{2} = imread('5-02.jpg');
normalcell{3} = imread('7-07.jpg');
normalcell{4} = imread('11-05.jpg');
normalcell{5} = imread('12_15.jpg');
normalcell{6} = imread('13_05.jpg');
normalcell{7} = imread('13_09.jpg');
normalcell{8} = imread('20_11.jpg');
normalcell{9} = imread('25_06.jpg');
normalcell{10} = imread('33_07.jpg');
normalcell{11} = imread('31_06.jpg');
normalcell{12} = imread('33_11.jpg');
normalcell{13} = imread('36_01.jpg');
normalcell{14} = imread('38_10.jpg');
normalcell{15} = imread('5_07.jpg');
normalcell{16} = imread('38_11.jpg');
normalcell{17} = imread('42_06.jpg');
normalcell{18} = imread('43_05.jpg');
normalcell{19} = imread('47_02.jpg');
normalcell{20} = imread('48_01.jpg');
normalcell{21} = imread('48_02.jpg');
normalcell{22} = imread('50_02.jpg');
normalcell{23} = imread('50_09.jpg');
normalcell{24} = imread('52_07.jpg');
normalcell{25} = imread('54_01.jpg');
normalcell{26} = imread('56_07.jpg');
normalcell{27} = imread('58_04.jpg');
normalcell{28} = imread('59_06.jpg');
normalcell{29} = imread('59_08.jpg');
normalcell{30} = imread('60_06.jpg');
normalcell{31} = imread('60_12.jpg');
normalcell{32} = imread('61_02.jpg');
normalcell{33} = imread('61_03.jpg');
normalcell{34} = imread('63_08.jpg');
normalcell{35} = imread('64_05.jpg');
normalcell{36} = imread('64_07.jpg');
normalcell{37} = imread('64_10.jpg');
normalcell{38} = imread('65_11.jpg');
normalcell{39} = imread('66_01.jpg');
normalcell{40} = imread('66_04.jpg');
normalcell{41} = imread('68_07.jpg');
normalcell{42} = imread('70_03.jpg');
normalcell{43} = imread('72_06.jpg');
normalcell{44} = imread('73_01.jpg');
normalcell{45} = imread('73_08.jpg');
normalcell{46} = imread('76_06.jpg');
normalcell{47} = imread('76_13.jpg');
normalcell{48} = imread('76_14.jpg');
normalcell{49} = imread('80_06.jpg');
normalcell{50} = imread('81_06.jpg');
normalcell{51} = imread('84_12.jpg');
normalcell{52} = imread('85_05.jpg');
normalcell{53} = imread('88_15.jpg');
normalcell{54} = imread('92_10.jpg');
normalcell{55} = imread('93_04.jpg');
normalcell{56} = imread('96_02.jpg');
normalcell{57} = imread('96_07.jpg');
normalcell{58} = imread('96_18.jpg');
normalcell{59} = imread('97_03.jpg');
normalcell{60} = imread('97_09.jpg');
normalcell{61} = imread('98_09.jpg');
normalcell{62} = imread('98_10.jpg');
normalcell{63} = imread('99.jpg');
normalcell{64} = imread('99_01.jpg');
normalcell{65} = imread('99_02.jpg');
normalcell{66} = imread('99_09.jpg');
normalcell{67} = imread('99_12.jpg');
normalcell{68} = imread('100_08.jpg');
normalcell{69} = imread('101_01.jpg');
normalcell{70} = imread('101_09.jpg');
normalcell{71} = imread('102_01.jpg');
normalcell{72} = imread('106_03.jpg');
normalcell{73} = imread('106_05.jpg');
normalcell{74} = imread('107_02.jpg');
normalcell{75} = imread('107_06.jpg');
normalcell{76} = imread('109_01.jpg');
normalcell{77} = imread('112_02.jpg');
normalcell{78} = imread('112_04.jpg');
normalcell{79} = imread('113_06.jpg');
normalcell{80} = imread('114_04.jpg');

abnormalcell{1} = imread('1-02.jpg');
abnormalcell{2} = imread('1-04.jpg');
abnormalcell{3} = imread('100-09.jpg');
abnormalcell{4} = imread('100-12.jpg');
abnormalcell{5} = imread('101-11.jpg');
abnormalcell{6} = imread('103-02.jpg');
abnormalcell{7} = imread('104-01.jpg');
abnormalcell{8} = imread('108-02.jpg');
abnormalcell{9} = imread('113-05.jpg');
abnormalcell{10} = imread('117-02.jpg');
abnormalcell{11} = imread('10-02.jpg');
abnormalcell{12} = imread('11-01.jpg');
abnormalcell{13} = imread('11-02.jpg');
abnormalcell{14} = imread('11-03.jpg');
abnormalcell{15} = imread('11-04.jpg');
abnormalcell{16} = imread('11-07.jpg');
abnormalcell{17} = imread('11-09.jpg');
abnormalcell{18} = imread('12-02.jpg');
abnormalcell{19} = imread('12-14.jpg');
abnormalcell{20} = imread('12-16.jpg');
abnormalcell{21} = imread('12-20.jpg');
abnormalcell{22} = imread('13-06.jpg');
abnormalcell{23} = imread('13-07.jpg');
abnormalcell{24} = imread('1-06.jpg');
abnormalcell{25} = imread('13-08.jpg');
abnormalcell{26} = imread('13-10.jpg');
abnormalcell{27} = imread('14-04.jpg');
abnormalcell{28} = imread('14-05.jpg');
abnormalcell{29} = imread('14-11.jpg');
abnormalcell{30} = imread('14-14.jpg');
abnormalcell{31} = imread('14-16.jpg');
abnormalcell{32} = imread('100-04.jpg');
abnormalcell{33} = imread('100-05.jpg');
abnormalcell{34} = imread('100-06.jpg');
abnormalcell{35} = imread('101-03.jpg');
abnormalcell{36} = imread('101-04.jpg');
abnormalcell{37} = imread('101-06.jpg');
abnormalcell{38} = imread('101-07.jpg');
abnormalcell{39} = imread('102-03.jpg');
abnormalcell{40} = imread('104-03.jpg');
abnormalcell{41} = imread('106-02.jpg');
abnormalcell{42} = imread('106-04.jpg');
abnormalcell{43} = imread('106-06.jpg');
abnormalcell{44} = imread('107-01.jpg');
abnormalcell{45} = imread('107-03.jpg');
abnormalcell{46} = imread('107-09.jpg');
abnormalcell{47} = imread('108-01.jpg');
abnormalcell{48} = imread('108-04.jpg');
abnormalcell{49} = imread('108-05.jpg');
abnormalcell{50} = imread('108-09.jpg');
abnormalcell{51} = imread('109-03.jpg');
abnormalcell{52} = imread('109-05.jpg');
abnormalcell{53} = imread('109-06.jpg');
abnormalcell{54} = imread('110-02.jpg');
abnormalcell{55} = imread('110-03.jpg');
abnormalcell{56} = imread('110-04.jpg');
abnormalcell{57} = imread('110-05.jpg');
abnormalcell{58} = imread('110-06.jpg');
abnormalcell{59} = imread('110-07.jpg');
abnormalcell{60} = imread('110-09.jpg');
abnormalcell{61} = imread('110-10.jpg');
abnormalcell{62} = imread('110-11.jpg');
abnormalcell{63} = imread('111-01.jpg');
abnormalcell{64} = imread('111-05.jpg');
abnormalcell{65} = imread('111-06.jpg');
abnormalcell{66} = imread('112-05.jpg');
abnormalcell{67} = imread('113-02.jpg');
abnormalcell{68} = imread('113-04.jpg');
abnormalcell{69} = imread('113-07.jpg');
abnormalcell{70} = imread('114-02.jpg');
abnormalcell{71} = imread('114-05.jpg');
abnormalcell{72} = imread('114-06.jpg');
abnormalcell{73} = imread('114-10.jpg');
abnormalcell{74} = imread('114-12.jpg');
abnormalcell{75} = imread('115-06.jpg');
abnormalcell{76} = imread('116-01.jpg');
abnormalcell{77} = imread('116-02.jpg');
abnormalcell{78} = imread('116-04.jpg');
abnormalcell{79} = imread('116-09.jpg');
abnormalcell{80} = imread('116-10.jpg');

cellNum = 80;

for i = 1:cellNum
    abnormalcell{i} = single(rgb2gray(abnormalcell{i}));
    normalcell{i} = single(rgb2gray(normalcell{i}));
    [f{i},d{i}] = vl_sift(normalcell{i});
    [fab{i},dab{i}] = vl_sift(abnormalcell{i});
end
for i = 1:cellNum%calculate the degree of difference
    for j = 1:cellNum
        [matches{i,j}, scores{i,j}] = vl_ubcmatch(d{i}, d{j});
        [matches{cellNum+i,j}, scores{cellNum+i,j}] = vl_ubcmatch(dab{i}, dab{j});
    end
end
for i = 1:cellNum%obtain the ten most representative images
    for j = 1:cellNum
        temp(i,j) = sum(scores{i,j});
        temp(cellNum+i,j) = sum(scores{cellNum+i,j});
    end
end
for i = 1:cellNum
    nsumscores(i) = sum(temp(i,:));
    abnsumscores(i) = sum(temp(cellNum+i,:));
end
[Sn,nindex] = sort(nsumscores);
[Sabn,abnindex] = sort(abnsumscores);
for i = 1:cellNum%find the difference between each image and the representative image
    for j = 1:10
        [finalmatches{i,j}, finalscores{i,j}] = vl_ubcmatch(d{nindex(j)}, d{i});
        [finalmatches{i,10+j}, finalscores{i,10+j}] = vl_ubcmatch(dab{abnindex(j)}, d{i});
        [finalmatches{cellNum+i,j}, finalscores{cellNum+i,j}] = vl_ubcmatch(d{nindex(j)}, dab{i});
        [finalmatches{cellNum+i,10+j}, finalscores{cellNum+i,10+j}] = vl_ubcmatch(dab{abnindex(j)}, dab{i});
    end
end
for i = 1:cellNum
    for j = 1:20
        temp2(i,j) = sum(finalscores{i,j});
        temp2(cellNum+i,j) = sum(finalscores{cellNum+i,j});
    end
end
for i = 1:cellNum  
    scoreDifference(i,1) = sum(temp2(i,1:10));
    scoreDifference(i,2) = sum(temp2(i,11:20));
    scoreDifference(cellNum+i,1) = sum(temp2(cellNum+i,1:10));
    scoreDifference(cellNum+i,2) = sum(temp2(cellNum+i,11:20));
end
for i = 1:160
    divline = scoreDifference(i,2);
    count1 = 0;
    count2 = 0;
    for j = 1:80
        if divline > scoreDifference(j,2);
            count1 = count1+1;
        end
        if divline < scoreDifference(j,2);
            count1 = count1+1;
        end
        if divline > scoreDifference(j+80,2);
            count2 = count2+1;
        end
        if divline < scoreDifference(j+80,2);
            count2 = count2+1;
        end
    end
    if percentage1 < count1/160
        percentage1 = count1/160;
        divline1 = divline;
        num = i;
    end
    if percentage2 < count2/160
        percentage2 = count2/160;
        divline2 = divline;
    end
end
