# Supplementary material for: Computer-Assisted System with Multiple Feature Fused Support Vector Machine for Sperm Morphology Diagnosis
Source: Biomed Res Int. 2013 Sep 26;2013:687607. doi: 10.1155/2013/687607 (PMC3803132; doi:10.1155/2013/687607)
Supplement: Supplementary file 1 — We provide all the code and images necessary for accomplishment of our experiment, the code is produced with Matlab 2008a and the guidance of using the code to produce the results listed in the issue is also included [file 687607.f1.zip › Supplementary Material/code and image/code/sysmetry_circle.m]

clear;
close all;
load 33_07xy3-4.mat;
figure(1),plot(x,y);
axis([80  120  30  80]);
hold on;
[m n]=size(x);

for n=1:1:m-1;
    n
    if (n==1)
    lindex=m;
    rindex=n+1;
    elseif (n==m)
    lindex=n-1;
    rindex=1;
    else
    lindex=n-1;
    rindex=n+1;
    end
    difd=0;
for i=1:1:(m/2-1)
    lindex=lindex-1;
if  lindex<=0
    lindex=m/2;
elseif  lindex>=m/2
    lindex=1;
else
end

xl(i)=x(lindex);
yl(i)=y(lindex);

rindex=rindex+1;

if  rindex<=0
    rindex=m/2;
elseif  rindex>=m/2
    rindex=1;
else
end

xr(i)=x(rindex);
yr(i)=y(rindex);

disl(i)=sqrt((x(n)-xl(i))^2+(y(n)-yl(i))^2);
disr(i)=sqrt((x(n)-xr(i))^2+(y(n)-yr(i))^2);

difd=difd+abs(disl(i)-disr(i));
end
s(n)=difd;
end
figure(2), plot(s,'-k');
s1=s<250;

[c0,I0] = min(s(1,1:100))
[c1,I1] = min(s(1,101:m-1))


figure(1),plot([x(I0) x(I1+100)], [y(I0) y(I1+100)]);
axis([80  120  30  80]);
